# Supplementary material for: Circulating Vascular Cell Adhesion Molecule‐1 and Incident Heart Failure: The Multi‐Ethnic Study of Atherosclerosis (MESA)
Source: PubMed Central journal article supplement — J Am Heart Assoc. 2020 Nov 9;9(22):e019390. doi: 10.1161/JAHA.120.019390 (PMC7763727; doi:10.1161/jaha.120.019390), 2020-11-09

# **SUPPLEMENTAL MATERIAL**

**Table S1. Clinical Characteristics at Exam 1 by Study Inclusion Status.**

|                                                 | Excluded<br>(n=4517) | Included<br>(n=2297) | P value |
|-------------------------------------------------|----------------------|----------------------|---------|
| Age, y, mean $\pm$ SD                           | 62.5 $\pm$ 10.3      | 61.4 $\pm$ 10.1      | <0.001  |
| Female, n (%)                                   | 2381 (52.7)          | 1220 (52.1)          | 0.75    |
| Race/Ethnicity                                  |                      |                      | <0.001  |
| Black, n (%)                                    | 1339 (29.6)          | 553 (24.1)           |         |
| White, n (%)                                    | 2055 (45.5)          | 567 (24.7)           |         |
| Hispanic, n (%)                                 | 913 (20.2)           | 583 (25.4)           |         |
| Chinese, n (%)                                  | 210 (4.7)            | 596 (25.9)           |         |
| Body mass index, kg/m <sup>2</sup>              | 28.6 $\pm$ 5.5       | 27.8 $\pm$ 5.4       | <0.001  |
| Systolic blood pressure, mmHg, mean $\pm$ SD    | 127 $\pm$ 22         | 125 $\pm$ 21         | <0.001  |
| Diastolic blood pressure, mmHg, mean $\pm$ SD   | 72 $\pm$ 10          | 72 $\pm$ 10          | 0.49    |
| Anti-hypertensive medication, n (%)             | 1733 (38.4)          | 803 (35.0)           | 0.007   |
| Diabetes mellitus, n (%)                        | 559 (12.4)           | 286 (12.5)           | 0.99    |
| Smoking Status                                  |                      |                      | <0.001  |
| Current smoker, n (%)                           | 582 (12.9)           | 305 (13.3)           |         |
| Former smoker, n (%)                            | 1762 (39.2)          | 725 (31.7)           |         |
| Never smoker, n (%)                             | 2157 (47.9)          | 1261 (55.0)          |         |
| Total cholesterol, mg/dL, mean $\pm$ SD         | 194 $\pm$ 36         | 194 $\pm$ 34         | 0.70    |
| LDL cholesterol, mg/dL, mean $\pm$ SD           | 117 $\pm$ 32         | 117 $\pm$ 31         | 0.86    |
| HDL cholesterol, mg/dL, mean $\pm$ SD           | 51 $\pm$ 15          | 51 $\pm$ 14          | 0.10    |
| eGFR, mL/min/1.73m <sup>2</sup> , mean $\pm$ SD | 74.1 $\pm$ 16.1      | 75.1 $\pm$ 17.3      | 0.03    |

eGFR = estimated glomerular filtration rate; HDL = high-density lipoprotein; LDL = low-density lipoprotein; VCAM-1 = vascular cell adhesion molecule-1

**Figure S1. STROBE Flow Diagram for Study Inclusion.**

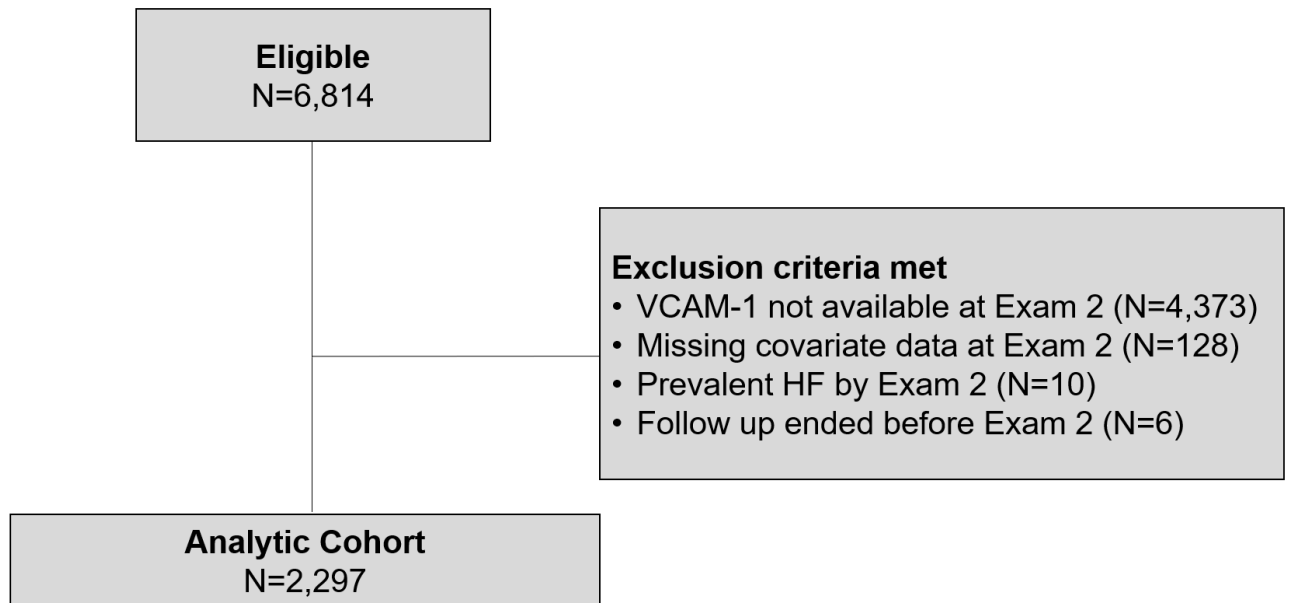

Supplement: JAH3-9-e019390-s001.pdf [file JAH3-9-e019390-s001.pdf]
